# Supplementary material for: Bridging policy and practice in climate change education: evidence from Northeast Thailand
Source: Frontiers journal article supplement (doi:10.3389/feduc.2025.1561574), 2025-07-16
Supplement: Data_Sheet_1.pdf [file Data_Sheet_1.pdf]

## Supplementary Material

### 1 Supplementary Data

#### 1.1 Qualitative Data on Climate Change Education, by theme

| Theme                        | Key insights                                                                                                                          | Quotes                                                                                                                                                                                                                                                                                                                 |
|------------------------------|---------------------------------------------------------------------------------------------------------------------------------------|------------------------------------------------------------------------------------------------------------------------------------------------------------------------------------------------------------------------------------------------------------------------------------------------------------------------|
| <b>Teacher Training</b>      | Teachers highlighted that workshops combining theory and practical application increased their confidence and teaching effectiveness. | <p><i>"The training workshops were invaluable; the hands-on experience gave me the confidence to implement what I learned in the classroom."</i></p> <p><i>"I feel more confident when I have not just theoretical knowledge but also practical application to back it up."</i></p>                                    |
| <b>Institutional Support</b> | Teachers in supportive schools reported motivation to integrate CCE, while those lacking support described diminished enthusiasm.     | <p><i>"In our school, the institutional support is strong. We have the motivation to integrate climate change education because the administration backs us up."</i></p> <p><i>"Without institutional support, it's hard to stay motivated. We lack the resources and encouragement to effectively teach CCE."</i></p> |
| <b>Resource Availability</b> | Rural teachers creatively used local materials but expressed frustration over inadequate resources and unequal distribution.          | <p><i>"In rural areas, we have to get creative with what's available, but it's frustrating when the resources we need just aren't there."</i></p> <p><i>"We try to make do with whatever we can find, but it's hard to be effective without proper resources."</i></p>                                                 |

| Theme                          | Key insights                                                                                                             | Quotes                                                                                                                                                                                                                                                                                                      |
|--------------------------------|--------------------------------------------------------------------------------------------------------------------------|-------------------------------------------------------------------------------------------------------------------------------------------------------------------------------------------------------------------------------------------------------------------------------------------------------------|
| <b>Urban-Rural Disparities</b> | Rural teachers innovated under constraints but faced compounding disadvantages due to isolation and infrastructure gaps. | <p><i>"Rural teachers are innovative, but isolation and the lack of infrastructure make it much harder to deliver effective climate education."</i></p> <p><i>"We come up with creative solutions, but the lack of professional development and infrastructure just keeps compounding the problem."</i></p> |
| <b>Teacher Knowledge</b>       | Teachers with strong knowledge still struggled to implement CCE due to institutional and resource barriers.              | <p><i>"I know the content, but the lack of support and resources makes it so much harder to implement what I know."</i></p> <p><i>"Even though I have the knowledge, it's not easy to teach effectively when there are so many barriers like poor resources and little institutional support."</i></p>      |
